# Supplementary material for: Deficiency of GABARAP but Not Its Paralogs Causes Enhanced EGF-Induced EGFR Degradation
Source: MDPI journal article supplement (doi:10.3390/cells9051296), 2020-05-22
Supplement: s1 [file s1]

## Supplemental Figures

# Deficiency of GABARAP but not its paralogs causes enhanced EGF-induced EGFR degradation

Jochen Dobner<sup>1</sup>, Indra M. Simons<sup>1,2</sup>, Kerstin Rufinatscha<sup>3</sup>, Sebastian Hänsch<sup>4</sup>, Melanie Schwarten<sup>2</sup>, Oliver H. Weiergräber<sup>2</sup>, Iman Abdollahzadeh<sup>2,5</sup>, Thomas Gensch<sup>5</sup>, Johannes G. Bode<sup>3</sup>, Silke Hoffmann<sup>2</sup>, Dieter Willbold<sup>1,2\*</sup>

<sup>1</sup> Institut für Physikalische Biologie, Heinrich-Heine-Universität Düsseldorf, Universitätsstraße 1, 40225 Düsseldorf, Germany

<sup>2</sup> Institute of Biological Information Processing: Structural Biochemistry (IBI-7), Forschungszentrum Jülich, 52425 Jülich, Germany

<sup>3</sup> Department of Gastroenterology, Hepatology and Infectiology, University Hospital, Heinrich-Heine-Universität Düsseldorf, Moorenstraße 5, 40225 Düsseldorf, Germany

<sup>4</sup> Department of Biology, Center for Advanced Imaging (CAi), Heinrich-Heine-Universität Düsseldorf, Universitätsstraße 1, 40225 Düsseldorf, Germany

<sup>5</sup> Institute of Biological Information Processing – Molecular and Cell Physiology (IBI-1), Forschungszentrum Jülich, 52425 Jülich, Germany

Supplementary Figure S1 is related to Figures 1-8

Supplementary Figure S2 is related to Figure 1

Supplementary Figure S3 is related to Figure 5

Supplementary Figure S4 is related to Figure 7 and Movie S1

Supplementary Figure S5 is related to Figure 7 and Movie S2

Supplementary Figure S6 is related to Figures 1-4, 6, 8 and Figure S2

Supplementary Table S1 is related to Figures 1-8

Movie S1 is related to Figures 7 and S4

Movie S2 is related to Figures 7 and S5

## Supplemental Figures S1 - 6, Table S1, Movies S1 - 2

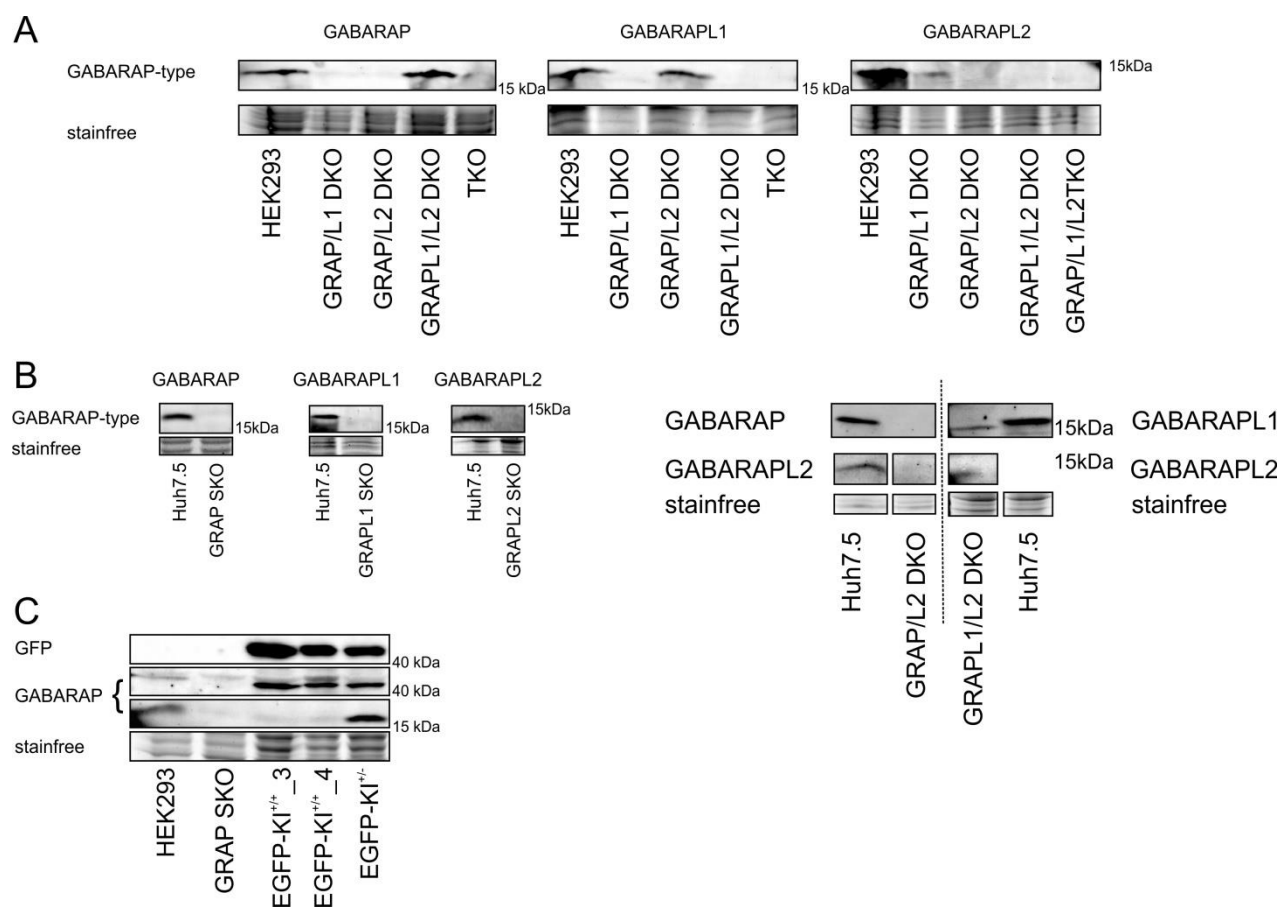

**Figure S1: Verification of CRISPR/Cas9 knockout and knock-in cell lines on protein level.**

Whole cell protein lysates were isolated and analyzed for presence of the indicated GABARAP subfamily member. (A) HEK293 based clonal KO cell lines. (B) Huh7.5 based clonal KO cell lines. (C) HEK293 based KI clonal lines. GRAP = GABARAP, GRAPL1 = GABARAPL1, GRAPL2 = GABARAPL2, TKO = GABARAP/L1/L2 TKO. SKO = single knockout, DKO = double knockout, TKO = triple knockout. Figure S7 G shows uncropped source blots

41 **Table S1: CRISPR sequence details and genotyping results of the knockout cell lines used.**42 HEK293 GABARAP, GABARAPL1 and GABARAPL2 SKOs have already been published (Simons *et al.*, 2019).

| Gene Symbol                | Uniprot | GeneID/<br>Location    | Targeting<br>strategy | CRISPR gRNA ( <u>PAM</u> )         | Main clone | Uniqu<br>e<br>Alleles | Mutation                                          | Protein Impact                              |
|----------------------------|---------|------------------------|-----------------------|------------------------------------|------------|-----------------------|---------------------------------------------------|---------------------------------------------|
| <b>Huh7.5</b>              |         |                        |                       |                                    |            |                       |                                                   |                                             |
| <i>GABARAP</i>             | O95166  | 11337/NC_000017.<br>11 | first exon            | GGATCTTCTCGCCCTCAGAG<br><u>CGG</u> | 3          | 1                     | c.[152_153insT]                                   | p.[fs*0]                                    |
| <i>GABARAPL1</i>           | Q9H0R8  | 23710/NC_000012.<br>12 | second<br>exon        | AGAGAAGGCTCCAAAAGCC<br><u>AGGG</u> | G5         | 3                     | c.[352_358_del];[<br>353_356del];[154<br>_355del] | p.[K38Gfs*9];[K3<br>8Gfs*11];[K38Sfs<br>*3] |
| <i>GABARAPL2</i>           | P60520  | 11345/NC_000016.<br>1  | second<br>exon        | TCCCACAGAACACAGATGCG<br><u>TGG</u> | F6         | 1                     | c.[179_180insT]                                   | p.[C15Lfs*27]                               |
| <i>GABARAP/L2</i><br>DKO   | O95166  | 11337/NC_000017.<br>11 | first exon            | GGATCTTCTCGCCCTCAGAG<br><u>CGG</u> | G8         | 2                     | c.[152_153insTT]<br>;[152_154insGG]               | p.[E17Lfs*36];[E<br>17Gfs*14]               |
|                            | P60520  | 11345/NC_000016.<br>1  | second<br>exon        | TCCCACAGAACACAGATGCG<br><u>TGG</u> |            | 2                     | c.[179_180insT];[<br>179_180insTG]                | p.[C15Lfs*27];[V<br>16Afs*15]               |
| <i>GABARAPL1/L2</i><br>DKO | Q9H0R8  | 23710/NC_000012.<br>12 | second<br>exon        | AGAGAAGGCTCCAAAAGCC<br><u>AGGG</u> | F5         | 2                     | c.[354_355del];[3<br>55del]                       | p.[K38Nfs*3];[A<br>39Pfs*10]                |
|                            | P60520  | 11345/NC_000016.<br>1  | second<br>exon        | TCCCACAGAACACAGATGCG<br><u>TGG</u> |            | 1                     | c.[179_180insT]                                   | p.[C15Lfs*27]                               |
| <b>HEK293</b>              |         |                        |                       |                                    |            |                       |                                                   |                                             |
| <i>GABARAP</i>             | O95166  | 11337/NC_000017.<br>11 | first exon            | GGATCTTCTCGCCCTCAGAG<br><u>CGG</u> | C2         | 1                     | c.[152_153insT]                                   | p.[fs*0]                                    |
| <i>GABARAPL1</i>           | Q9H0R8  | 23710/NC_000012.<br>12 | second<br>exon        | AGAGAAGGCTCCAAAAGCC<br><u>AGGG</u> | C10        | 2                     | c.[352_357del];[3<br>53_356]                      | p.[K38Tfs*10];[K<br>38Nfs*3]                |

|                               |                  |                                                 |                                              |                                                                          |                       |        |                                    |                               |
|-------------------------------|------------------|-------------------------------------------------|----------------------------------------------|--------------------------------------------------------------------------|-----------------------|--------|------------------------------------|-------------------------------|
| <i>GABARAPL2</i>              | P60520           | 11345/NC_000016.<br>1                           | second<br>exon                               | TCCCACAGAACACAGATGCG<br><u>TGG</u>                                       | #8                    | 1      | c.[179_180insT]                    | p.[C15Lfs*27]                 |
| <i>GABARAP/L1<br/>DKO</i>     | O95166           | 11337/NC_000017.<br>11                          | first exon                                   | GGATCTTCTCGCCCTCAGAG<br><u>CGG</u>                                       | A11 (based<br>on C10) | 2      | c.[152_153insT];[<br>148_151del]   | p.[fs*0];[K23Nfs*<br>6]       |
| <i>GABARAP/L2<br/>DKO</i>     | P60520           | 11345/NC_000016.<br>1                           | second<br>exon                               | TCCCACAGAACACAGATGCG<br><u>TGG</u>                                       | #8 (based on<br>C2)   | 1      | c.[179_180insT]                    | p.[C15Lfs*27]                 |
| <i>GABARAPL1/L2<br/>DKO</i>   | P60520           | 11345/NC_000016.<br>1                           | second<br>exon                               | TCCCACAGAACACAGATGCG<br><u>TGG</u>                                       | B3 (based on<br>C10)  | 1      | c.[179_180insT]                    | p.[C15Lfs*27]                 |
| <i>GABARAP/L1/L<br/>2 TKO</i> | O95166<br>P60520 | 11337/NC_000017.<br>11<br>11345/NC_000016.<br>1 | first exon<br>second<br>exon                 | GGATCTTCTCGCCCTCAGAG<br><u>CGG</u><br>TCCCACAGAACACAGATGCG<br><u>TGG</u> | #3 (based on<br>C10)  | 1<br>1 | c.[152_153insT]<br>c.[179_180insT] | p.[fs*0]<br>p.[C15Lfs*27]     |
| <i>GABARAP</i>                | O95166           | 11337/NC_000017.<br>11                          | first exon<br>+linearize<br>d HDR<br>plasmid | TACACGAACTTCATCCTCCC<br><u>GGG</u>                                       | 3                     | 1      | c.[ins717+21bpE<br>GFP+linker]     | p.[ins239+7aaEG<br>FP+linker] |

43

44 Formatting of indels detected in the knockout cell lines (Mutation column) and their resulting proteins (Protein impact column) is according to Human Genome  
45 Variation Society (<http://varnomen.hgvs.org/>). Mutation positions are determined in respect to the canonical isoform annotated in Uniprot, if more than one  
46 form exists. The numbers after the asterisks represent the number of amino acids present from the first amino acid changed to the next sequential stop codon.  
47 del, deletion; ins, insertion; c., coding DNA; p., protein; fs, frame shift; \*, stop codon.

48



A

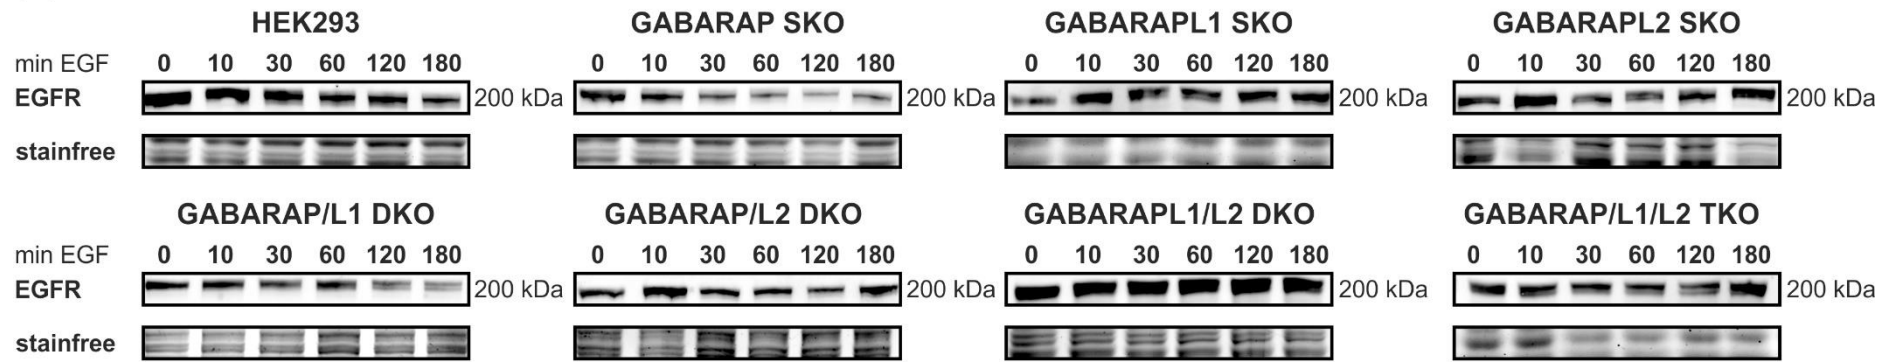

B

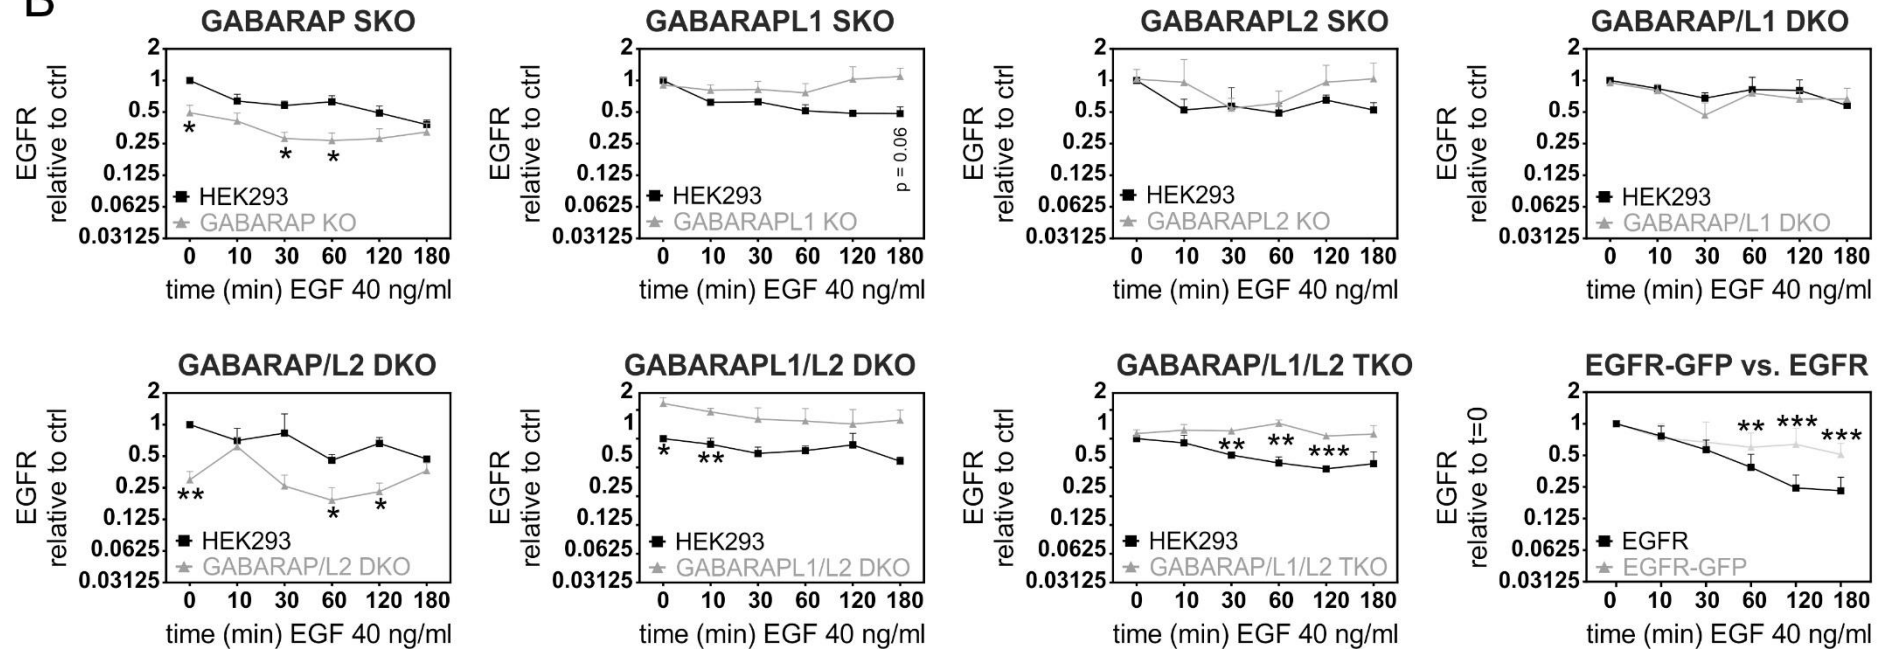

51 **Figure S2: Total EGFR levels in response to EGF treatment in HEK293 KO cells transiently overexpressing EGFR-GFP.**

52 (A) Cells were transfected with 2  $\mu$ g EGFR-GFP expression plasmid and two days post transfection treated with 40 ng/ml EGF for the indicated time points.  
53 Afterwards, total EGFR protein levels in whole cell lysates were analyzed by immunoblot. Representative blots are shown for at least n = 3 independent  
54 experiments. (B) Densitometric analysis of at least n = 3 independent experiments. Controls are directly associated to each experiment. Kinetics of EGF-induced  
55 EGFR-GFP degradation in EGFR-GFP transfected HEK293 compared to endogenous EGFR degradation is shown (EGFR-GFP n =  $\geq$  23, EGFR n = 20).  
56 Quantification of EGFR(-GFP) protein levels was performed by normalization on stain-free loading control and calculated as percentage of HEK293 control  
57 cells at unstimulated conditions (t = 0). For comparison between EGFR-GFP overexpression and endogenous EGFR, kinetics of each level of EGFR expression  
58 (overexpression or endogenous) is displayed (t = 0 for each condition individually). Error bars represent standard error of means. Asterisks mark significant  
59 differences versus the corresponding time point of control cells and were calculated using independent t-test.  $p \leq 0.05 = *$ ,  $p \leq 0.01 = **$ ,  $p \leq 0.001 = ***$ . Respective  
60 wildtype controls were run on the same PAGE for each KO cell line and can be found in figure S7 H which also shows the uncropped source blots.

## A mean vesicular volume distribution

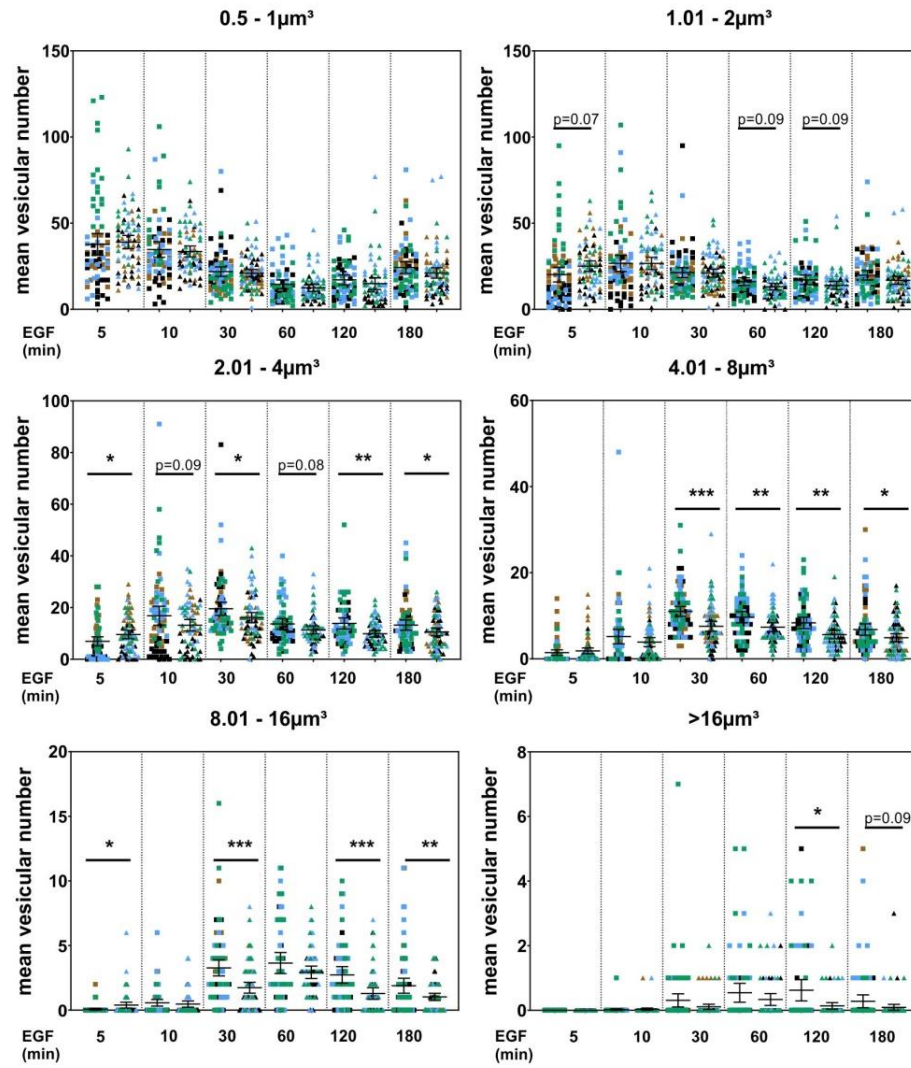

## B mean vesicular intensity distribution

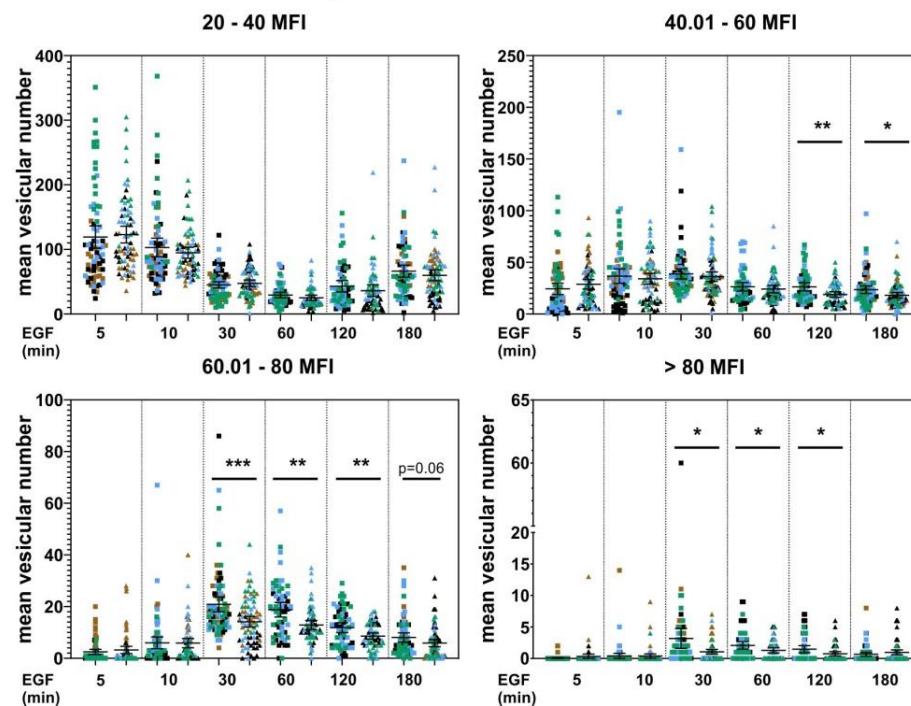



C

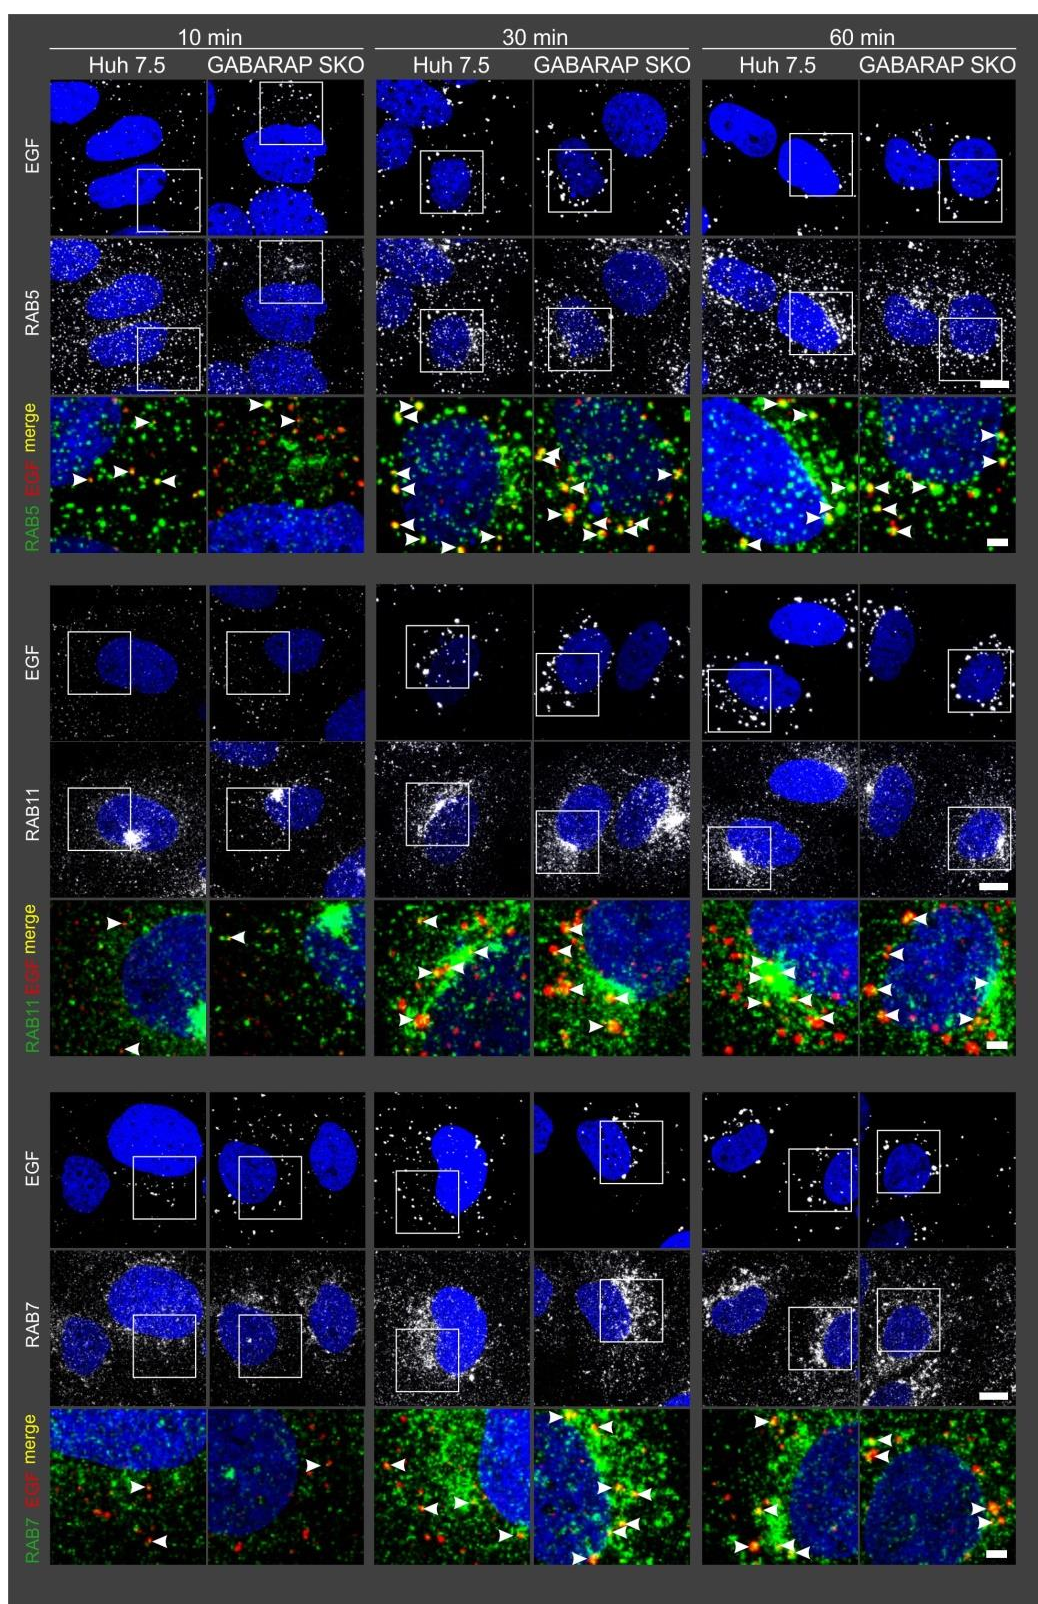

62

63 Figure S3: Analysis of EGF-Alexa647 containing vesicles of GABARAP SKO and Huh7.5 cells by  
 64 Imaris and analysis of endosomal markers RAB 5, RAB11 and RAB7 in response to EGF treatment  
 65 in GABARAP SKO and Huh7.5 control cells.

Vesicles of GABARAP SKO and Huh7.5 control cells which were treated with 40 ng/ml EGF-Alexa647 were modelled with Imaris imaging analysis software (described in detail in figure 5 and materials and methods section). (A) Mean vesicular volumes were largely unaffected by GABARAP-deficiency in GABARAP SKO cells although tendency for less vesicles with a diameter of 16 – 32  $\mu\text{m}^3$  was observable for GABARAP SKO cells after 30 min of treatment. Asterisks mark significant differences at indicated time points versus control cells as calculated using independent t-test.  $p \leq 0.01 = **$ . (B) Mean fluorescence intensities of EGF-Alexa647 positive vesicles classified into four arbitrary groups for GABARAP SKO and Huh7.5 control cells revealed significantly less vesicles with highest mean fluorescence intensities  $> 80$  for GABARAP SKO cells compared to Huh7.5 control cells after 30 min of treatment. (B+C) Individual experiments are color-coded;  $> 50$  cells per genotype and time point were analyzed. Error bars represent 95 % CI (C-E). Asterisks mark significant differences to the corresponding time point of control cells and were calculated using independent t-test.  $p \leq 0.05 = *$ ,  $p \leq 0.01 = **$ ,  $p \leq 0.001 = ***$ . (C) Huh7.5 and GABARAP SKO cells were pulse-treated with 40 ng/ml EGF-Alexa647 at 4 °C to allow binding to EGFR. After rigorous washing, cells were placed at 37 °C, fixed at distinct time points and stained for early (RAB5), recycling (RAB11) or late (RAB7) endosomes. All analyzed RAB proteins strongly accumulated within the first 30 min after EGF-Alexa647 pulse. Colocalization analysis of RAB proteins with EGF-Alexa647 (white arrowheads) revealed no alterations between GABARAP SKO and Huh7.5 control cells. MFI = mean fluorescence intensity Scale bar = 10  $\mu\text{m}$ , scale bar zoom = 3  $\mu\text{m}$ .

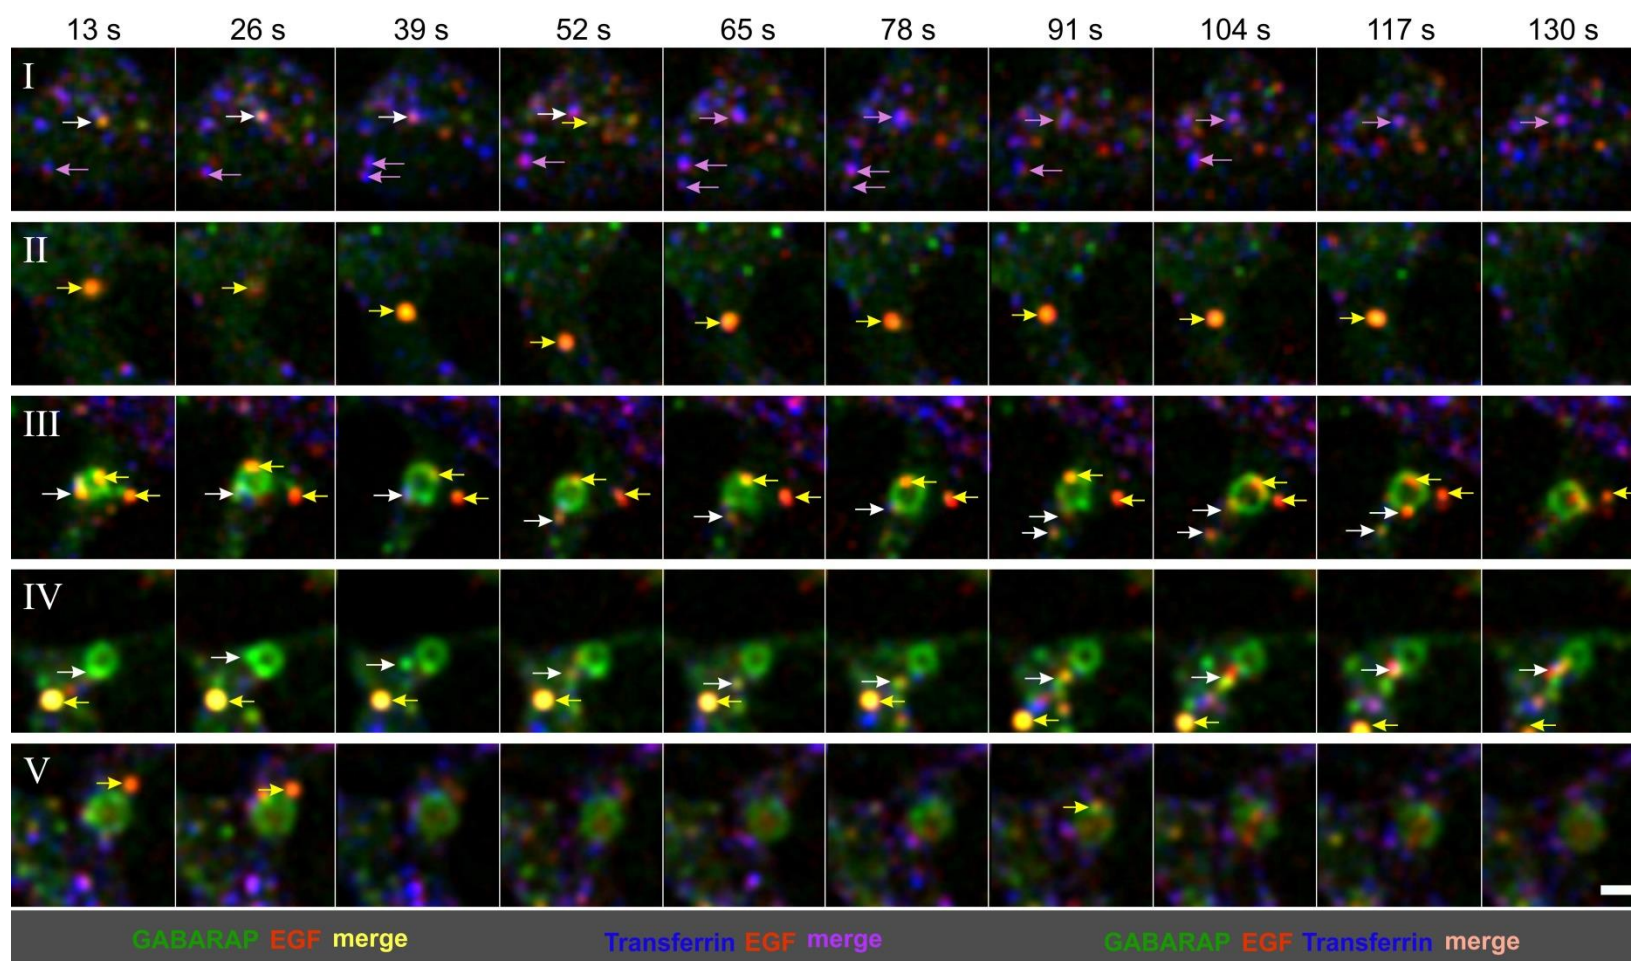

88

89 **Figure S4: Montage of live cell imaging of HEK293 knock-in cells expressing GFP-GABARAP under the endogenous *GABARAP* promoter and**  
 90 **stimulated with EGF-Alexa647 and Tf-Alexa555 by confocal laser scanning microscopy.**

91 HEK293 GFP-GABARAP KI cells were simultaneously treated with 40 ng/ml EGF-Alexa647 and 20 ng/ml Tf-Alexa555 for 60 min and imaged under  
 92 live-cell conditions by laser scanning microscopy. The montage shows snapshots of regions of interest I to V indicated in figure 7 A, covering a 117  
 93 s time frame. Images were taken at intervals of 13 s. Selected GABARAP/EGF positive signals are marked with yellow arrows, GABARAP/EGF/Tf  
 94 positive structures with white arrows and EGF/Tf positive vesicles with magenta arrows. Video can be found under movie S1. Scale bar = 3  $\mu$ m.



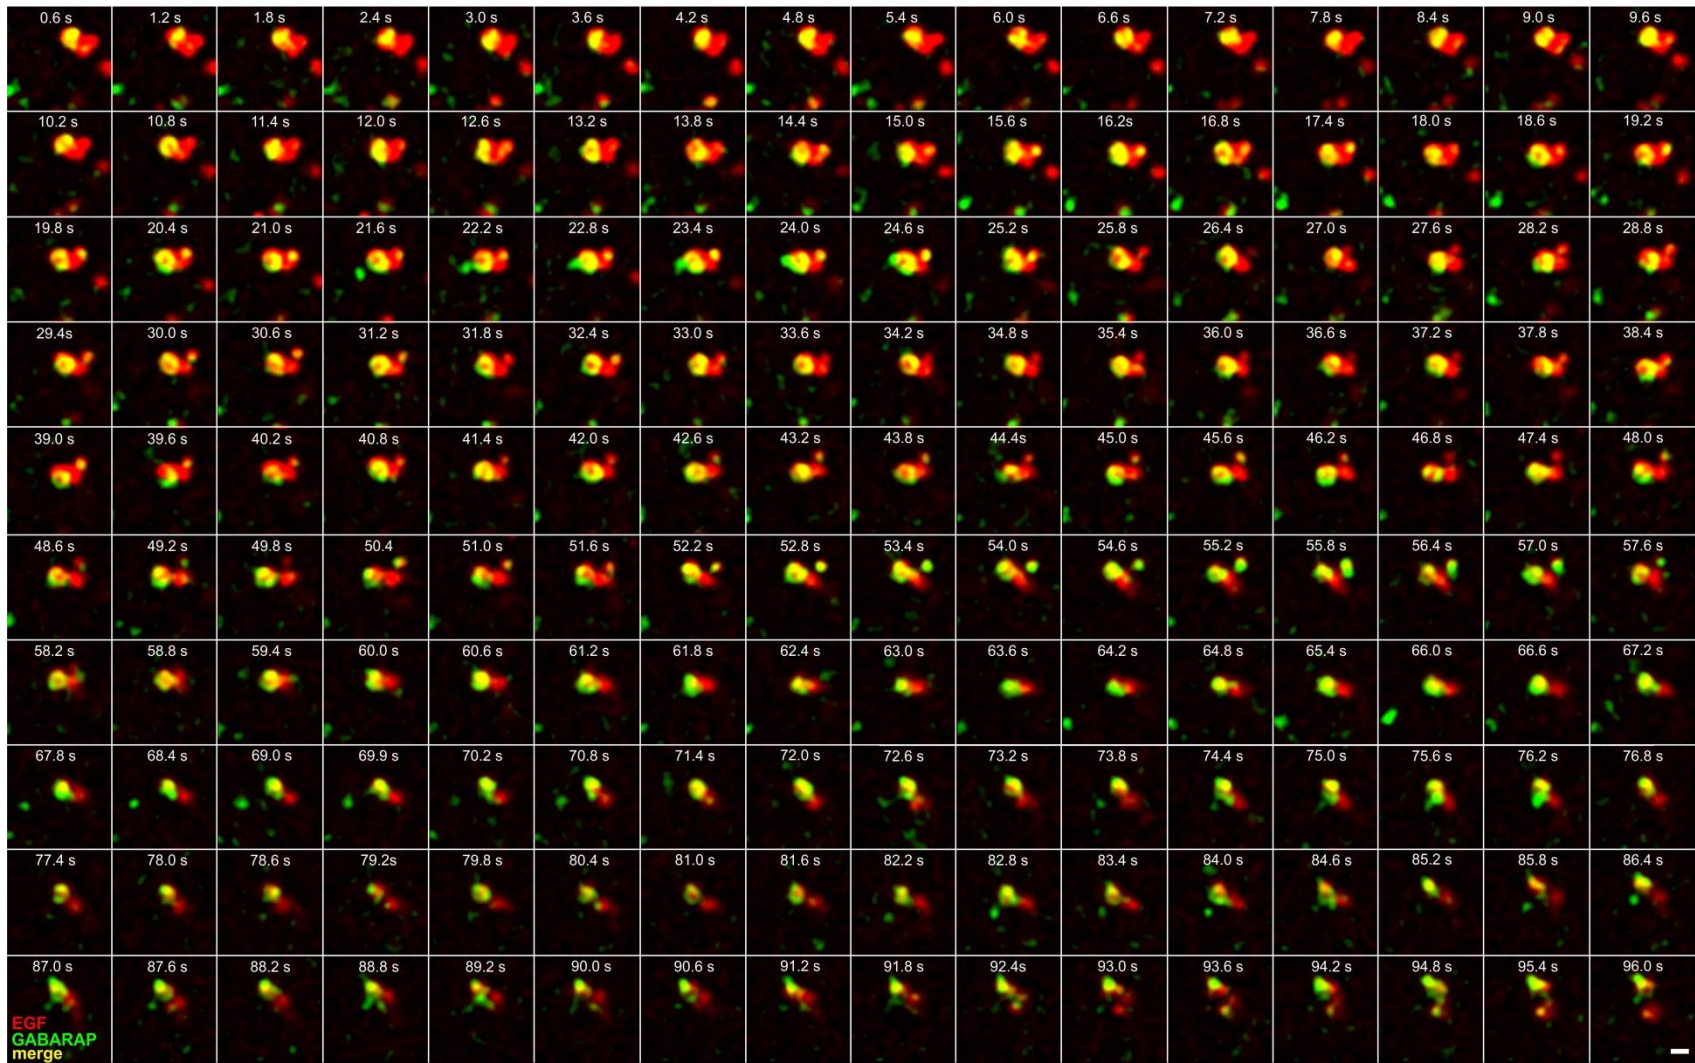

Figure S5: Live cell imaging of HEK293 KI cells expressing GFP-GABARAP under the endogenous *GABARAP* promoter and stimulated with EGF-Alexa647 by spinning disk confocal fluorescence microscopy.

98 HEK293 GFP-GABARAP KI cells were treated with 40 ng/ml EGF-Alexa647 for 60 min and imaged under live-cell conditions by spinning disk  
99 confocal fluorescence microscopy. The montage features selected time points for areas shown in figures 7 B to D. Dynamic vesicles which are  
100 GABARAP positive (green structures), EGF positive (red structures) or GABARAP/EGF double positive (yellow structures) are shown over a time  
101 course of 95.4 s with intervals of 0.6 s between images. GABARAP is shown in green and EGF in red. Video can be found under movie S2. Scale  
102 bar = 3 $\mu$ m.  
103

A Source blots corresponding to figure 1

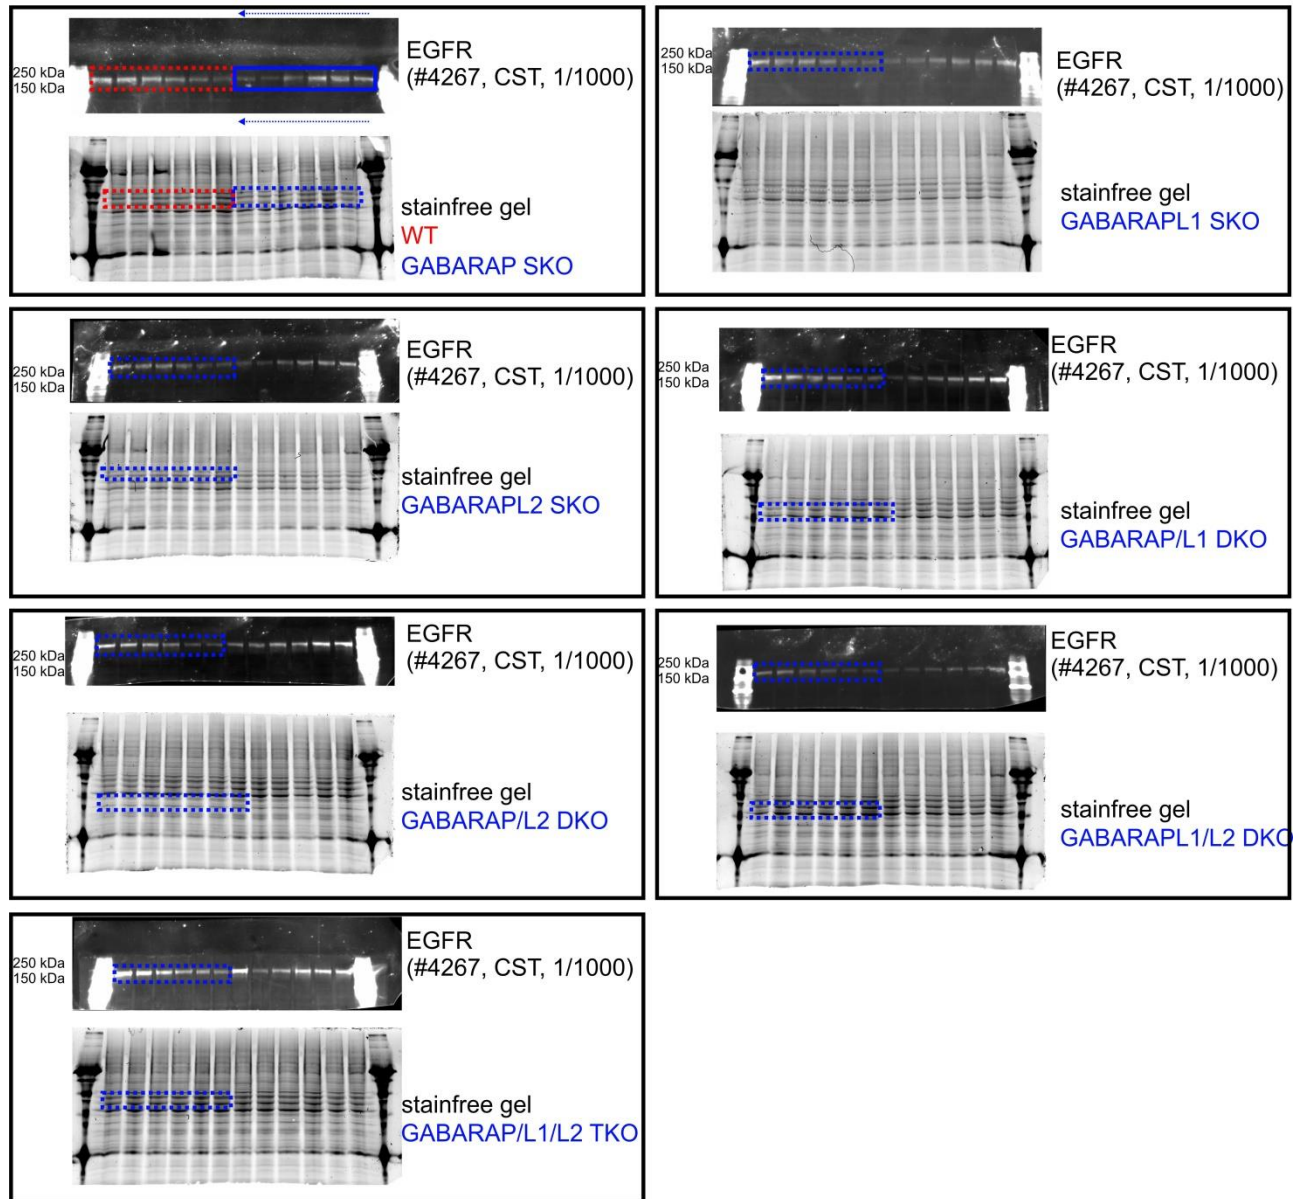

105

B Source blots corresponding to figure 2

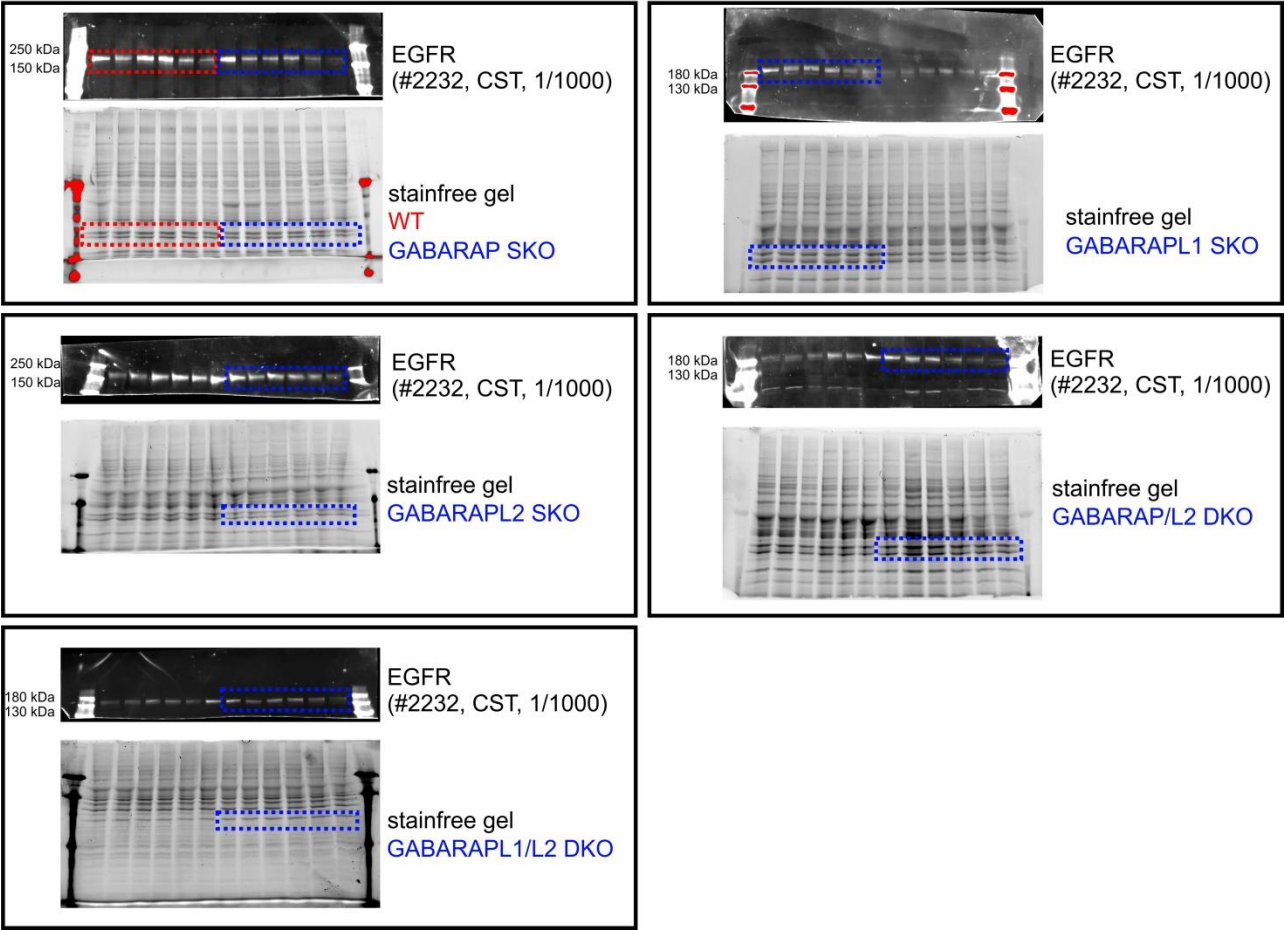

106



## C Source blots corresponding to figure 3

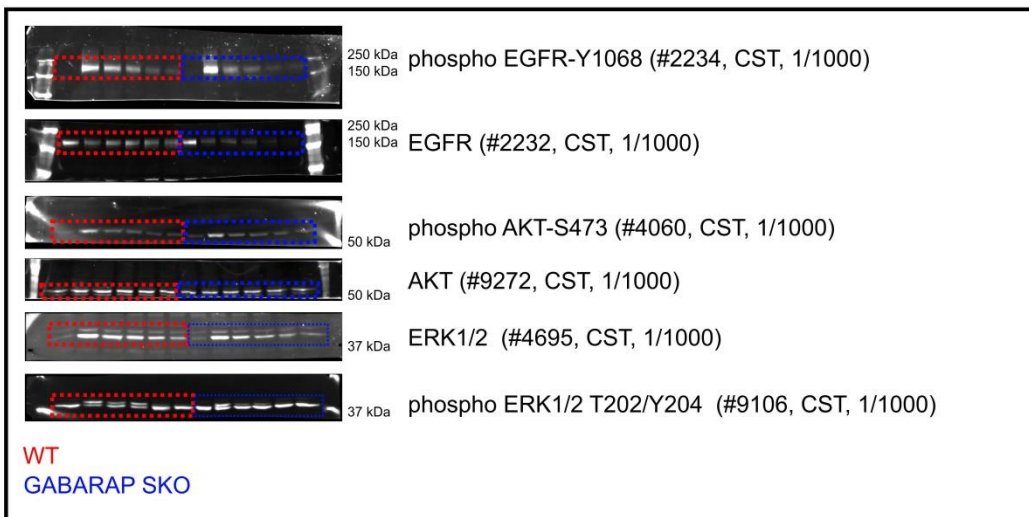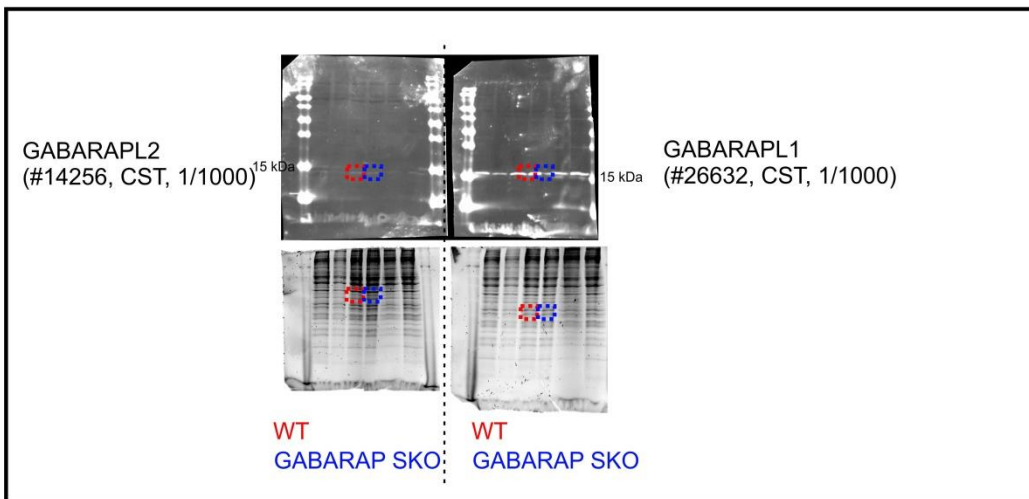

## D Source blots corresponding to figure 4

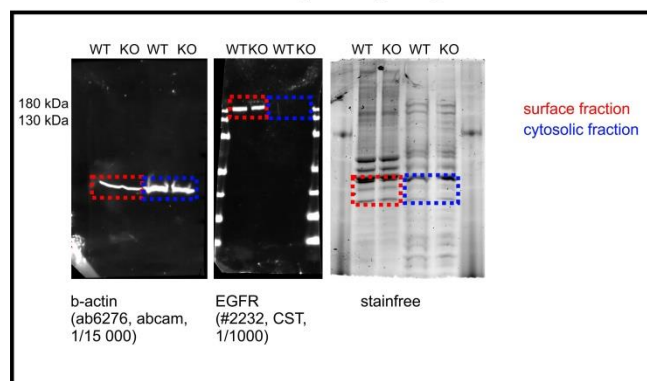



## E Source blots corresponding to figure 6

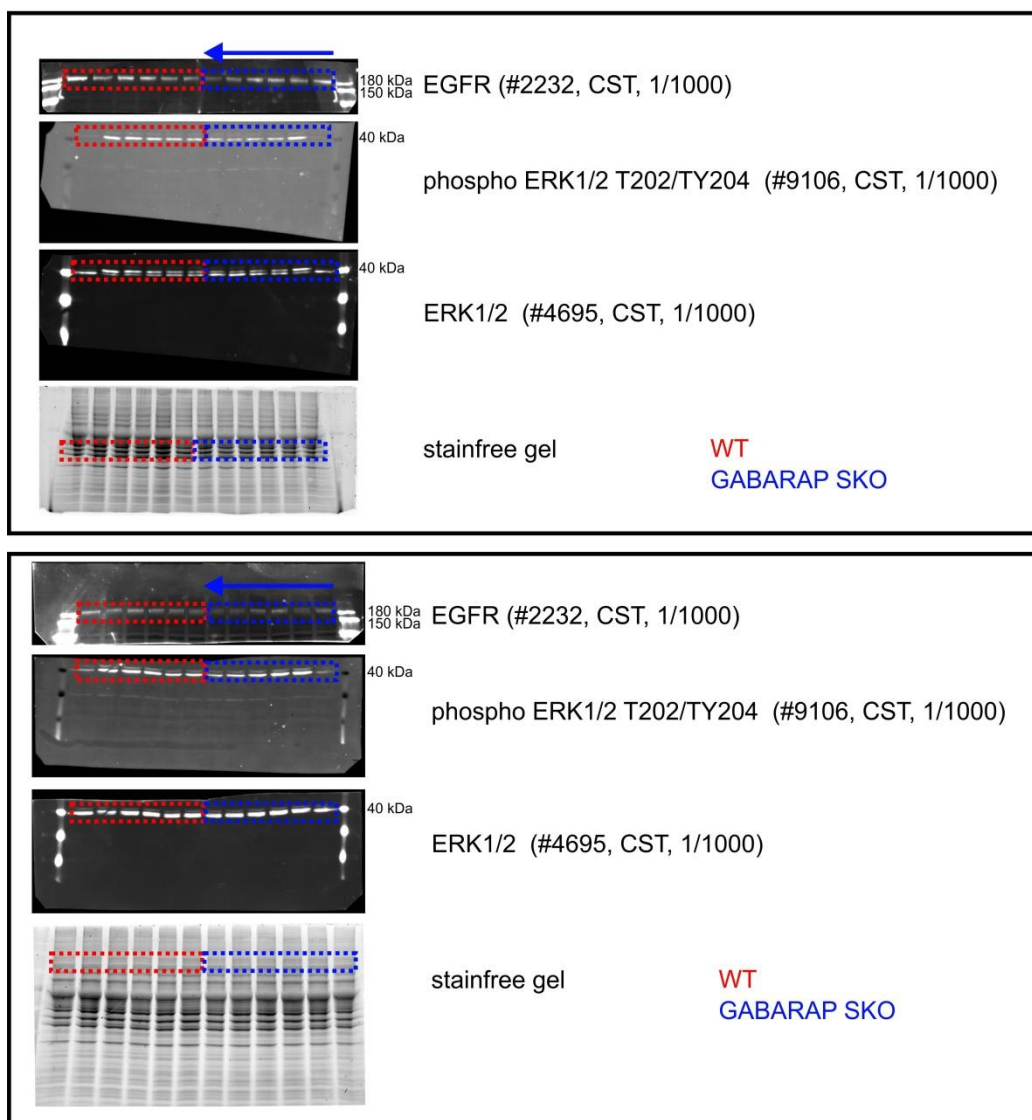

109

110

F Source blots corresponding to figure 8

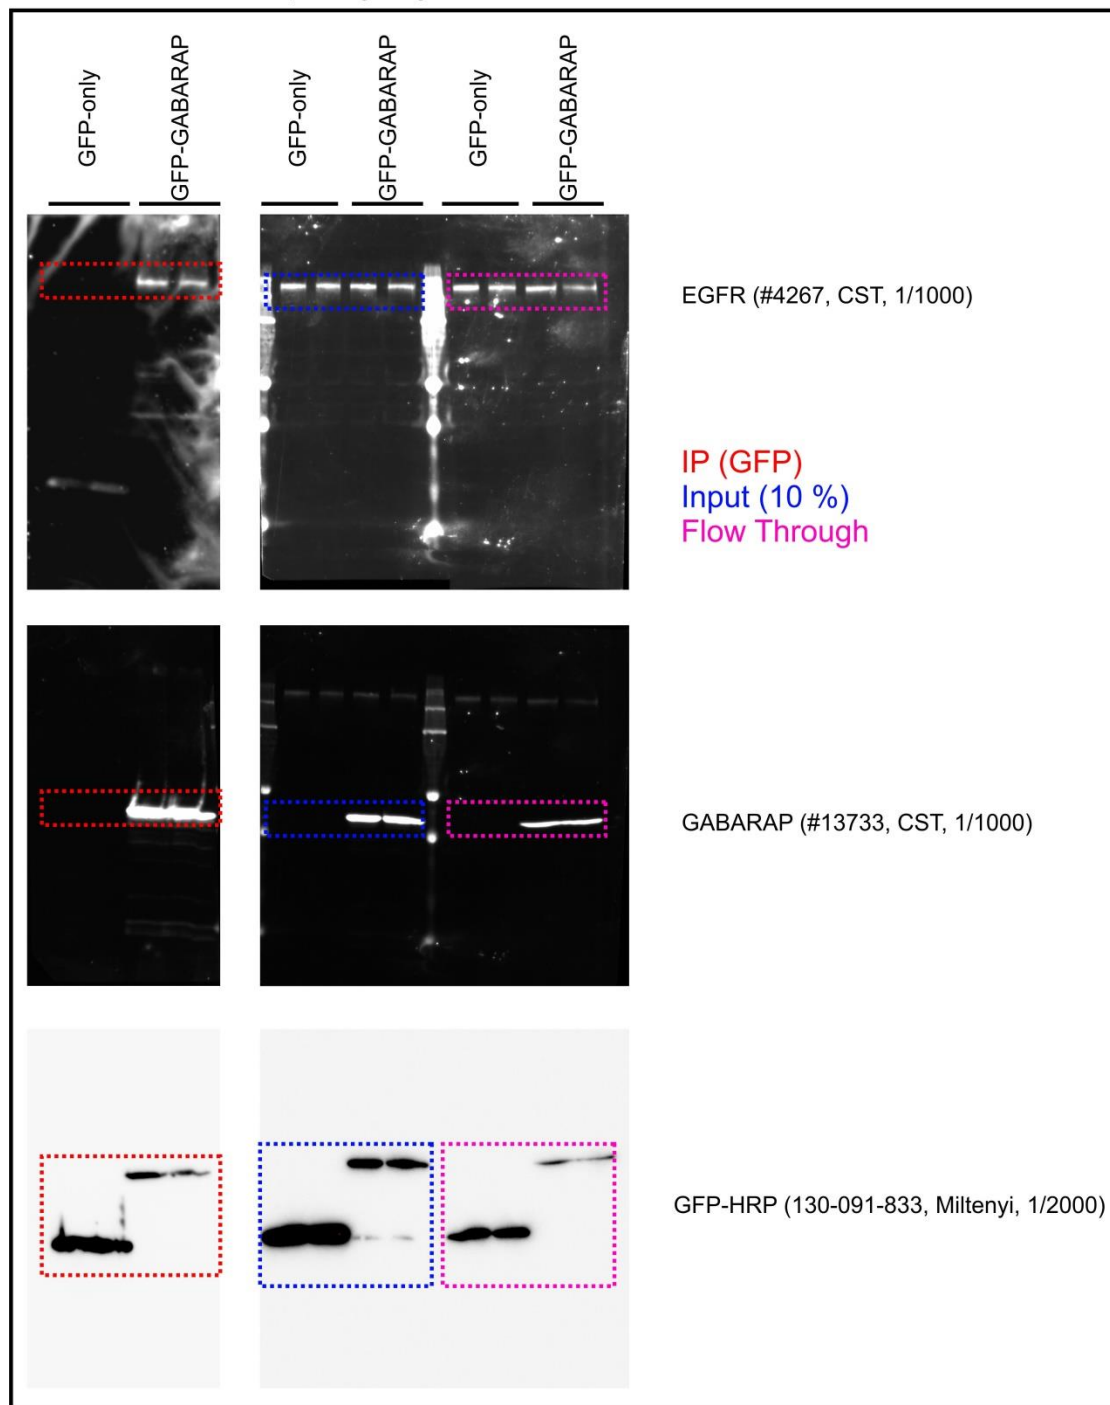

## G Source blots corresponding to figure S1

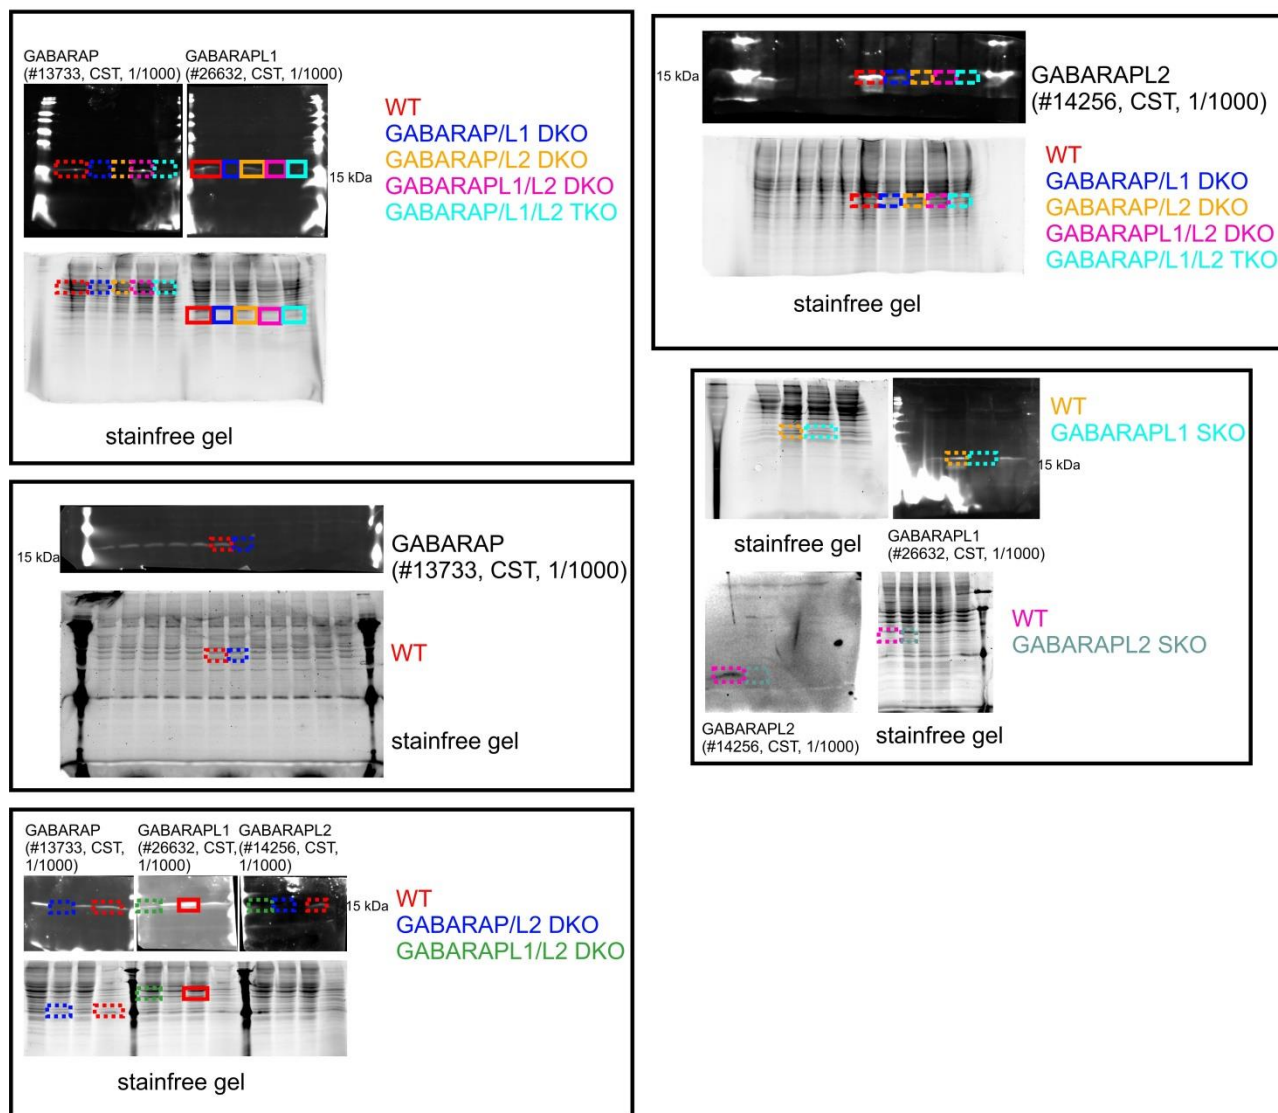

# H Source blots corresponding to figure S2

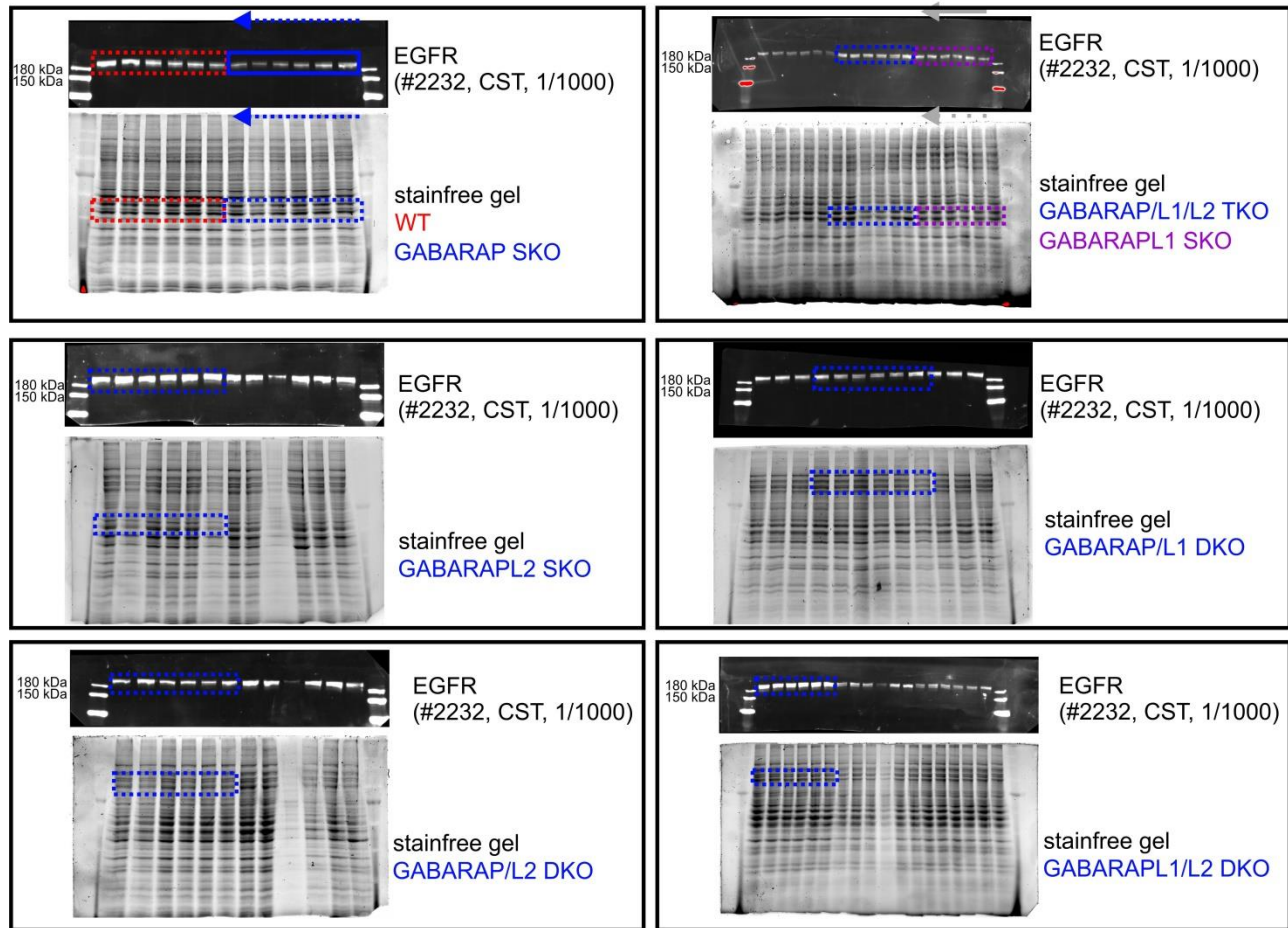

**Figure S6: Uncropped source blots of immunoblotting experiments.**

This figure contains the source blots corresponding to respective immunoblotting experiments as indicated. (A) Uncropped source blots corresponding to figure 1. (B) Uncropped source blots corresponding to figure 2. (C) Uncropped source blots corresponding to figure 3. (D) Uncropped source blots corresponding to figure 4. (E) Uncropped source blots corresponding to figure 6. (F) Uncropped source blots corresponding to figure 8. (G) Uncropped source blots corresponding to figure S1. (H) Uncropped source blots corresponding to figure S2. Used antibodies are indicated for each blot.
